# Supplementary material
Source: Springer Nature journal article supplement (https://www.springermedizin.de/resource/supplementary/13063_2014_2328_MOESM2_ESM.pdf/9621924)
Supplement: MOESM2 [file 9621924]

1. Looking at hub reports since 2008 I have a list of the projects you have been involved with here:

*(Give interviewee a copy of the list)*

|   | Methodology projects | Tick biggest impact |
|---|----------------------|---------------------|
| 1 |                      |                     |
| 2 |                      |                     |
| 3 |                      |                     |

1a Have we missed any projects from this list?

YES  Which ones are missing?  
*(Add missing ones to the list)*  
*(Then go to next question no 1b)*

NO  *(Go to next question no 1b)*

1b Which of these projects has had the biggest impact so far?

*(Tick the one with the biggest impact).*

*(Then go to next question no 1c)*

\*\*\*\*1c Thinking about the xxxxx project first, Can you give us more information about that project, in particular a brief rationale for why it was developed?

*(Then go to next question no 2)*

2. Has it become standard practice to use this method in CTU?

NO  *(Skip to question no 2a)*

YES  *(Go to next question no 2b)*

2a Has it been used in any CTU studies

NO  *(Skip to question no 3)*

YES  *(Go to next question no 2b)*

2b Can you tell me about the studies it is/was applied to in CTU? *(Go to next question 2c)*

|   | Study |
|---|-------|
| 1 |       |
| 2 |       |
| 3 |       |

2c **What was the benefit of using this method in each study?**

*(Go to next question no 3)*

| Study | Benefit |
|-------|---------|
| 1     |         |
| 2     |         |
| 3     |         |

## Use of method outside CTU

3 Are you aware of the method being used **outside CTU**?

NO  *(Skip to question no 4)*

YES  *(Go to next question no 3a)*

3a Do you know where it is being used? *(Which groups and studies)*

*(Then go to next question no 4)*

|   | Group | Study |
|---|-------|-------|
| 1 |       |       |
| 2 |       |       |
| 3 |       |       |

4 Has there been any software developed to accompany the method?

NO  *(Skip to question 5)*

YES  *(Go to next question no 4a)*

4a Can you tell me what that software does?

*(Go to next question no 4a1)*

4a1) Is it a Stata program?

NO  *(Go to question no 4b)* YES  *(Go to next question no 4a2)*

4a2) If YES, ask has it become a standard command in Stata?

NO  *(Go to next question no 4b)* YES  *(Go to next question no 4b)*

**4b Is the software used in CTU?**

**NO**  (Go to next question no 4c) **YES**  (Go to question no 4c)

**4c Are there any plans to roll it out?**

**NO**  (Skip to question no 4d) **YES**  (Go to next question no 4c1)

**4c1 Where? e.g.**

Publish in STATA journal

**NO**  **YES**   
(Then ask next question)

Can we include it as a resource in the methodology website? **NO**  **YES**   
(Go to next question no 4d)

**4d Does anyone else use it?**

**NO**  (Go to next question no 5)

**YES**

**Who?**

(Then Go to next question no 5)

**5 Has the method been further developed?**

**NO**  (Go to next question no 5a) **YES**  (Skip to question no 5b)

**5a Are there any plans to develop it?**

**NO**  (Skip to question no 6) **YES**  (Go to next question no 5b)

**5b What developments have been made or are planned?**

(Go to next question no 5c)

**5c) Where?**

**CTU**  (Go to next question no 5d) **External**  (Go to next question no 5d)

**5d) By whom? (Go to next question no 6)**

**6 Has use of the method to any new collaboration/s outside CTU? e.g. in particular, any new funding/grant applications**

(Go to next question no 6a)

NO  (Skip to question no 7) YES  (Go to next question no 6a)

**6a Can you tell me more about those?**

(Go through each one) (Then go to next question no 7)

| Developments | Collaboration | Funding/grant applications |
|--------------|---------------|----------------------------|
| 1            |               |                            |
| 2            |               |                            |

We already know about your presentations and publications but

**7 Are there any other ways that you have disseminated your method?  
E.g. conferences, text books, websites, workshops etc.**

(Then go to next question no 8)

**8 Are you aware that it has become included in any teaching materials  
e.g. training you have developed or part of MSc courses modules etc.?**

NO  (Skip to question no 9) YES  (Then go to next question no 8a)

**8a By whom?** (Then go to next question no 8b)

**8b Which course?**

(If there are no more methods listed in question 1 then go to next question no 9)

***If there were more methods listed in Question 1  
go through the following.***

We have concentrated on X method

Now can we focus on Y method

**Repeat all the above questions from question 1c \*\*\*\* to 8b**

(Then go to next question no 9)

**9 Do you or anybody else that worked on the project get emails  
enquiries about the method you developed?**

If **NO**

Thank the interviewee for their time

Tell them if they think of anything else to contact you

Ask if we can contact them with any queries

If **YES**

Ask if it is ok to set them up with this and explain how it works

**Thank them very much for their time**

**Ask if we can contact them again for further info?**
